# Supplementary material for: Open check dams and large wood: head losses and release conditions
Source: Copernicus journal article supplement (doi:10.5194/nhess-20-3293-2020), 2020-12-04
Supplement: Supplementary file 1 [file nhess-20-3293-2020-supplement.pdf]

Supplement of Nat. Hazards Earth Syst. Sci., 20, 3293–3314, 2020  
<https://doi.org/10.5194/nhess-20-3293-2020-supplement>  
© Author(s) 2020. This work is distributed under  
the Creative Commons Attribution 4.0 License.

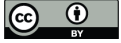

*Supplement of*

## **Open check dams and large wood: head losses and release conditions**

**Guillaume Piton et al.**

*Correspondence to:* Guillaume Piton ([guillaume.piton@inrae.fr](mailto:guillaume.piton@inrae.fr))

The copyright of individual parts of the supplement might differ from the CC BY 4.0 License.

# Supplement

## 1 Images of LW mixtures

5 The following pictures illustrate some LW mixture elements.

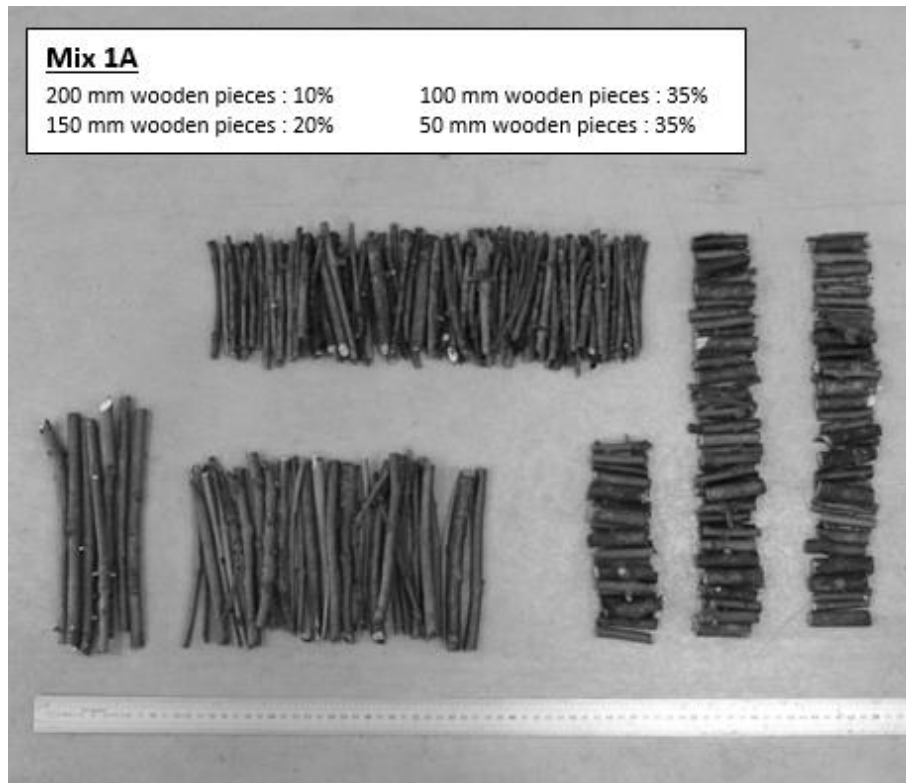

Fig. S 1: Mixture 1A

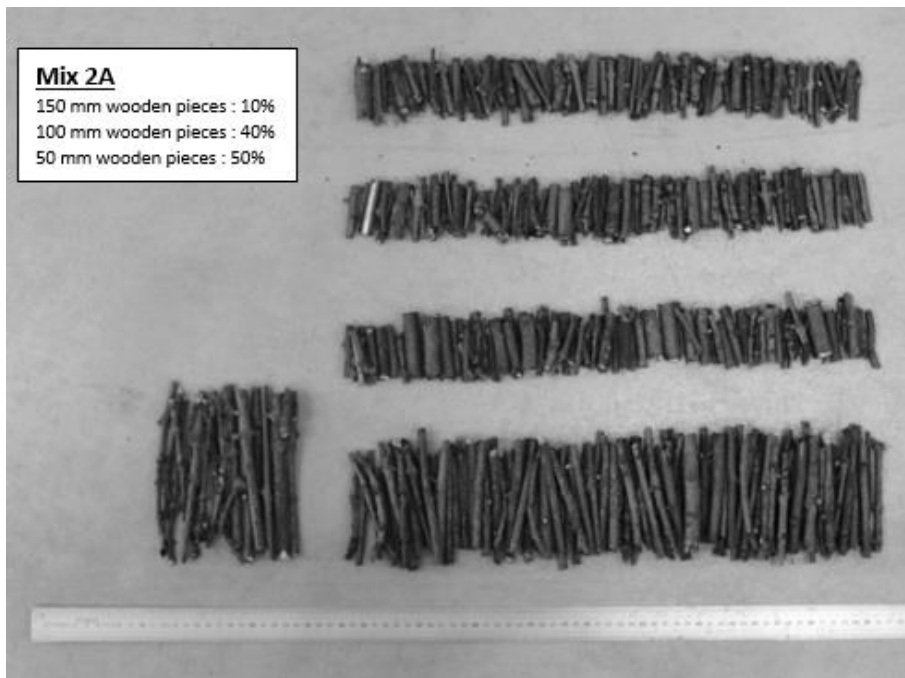

Fig. S 2: Mixture 2A

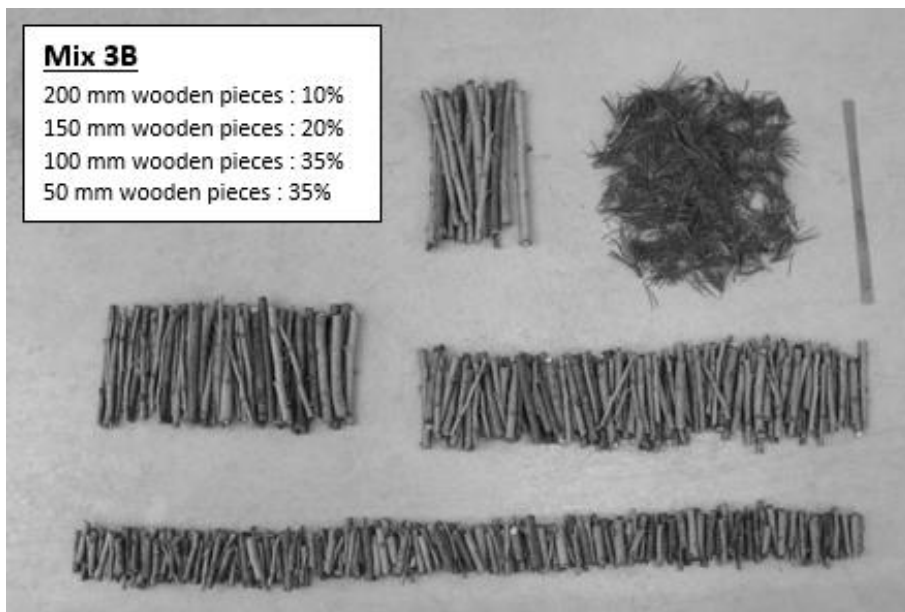

Fig. S 3: Mixture 3B

## 2 Sensitivity analysis on $\beta_i$ coefficients

Two figures are provided for each dam, one where various values of  $\beta_1$  are tested up to flow depths slightly overtopping the dam and one where various values of  $\beta_2$  are tested for flow overtopping the dam, assuming the best adjusted values of  $\beta_1$  (except for the closed dam where no  $\beta_1$  is used).

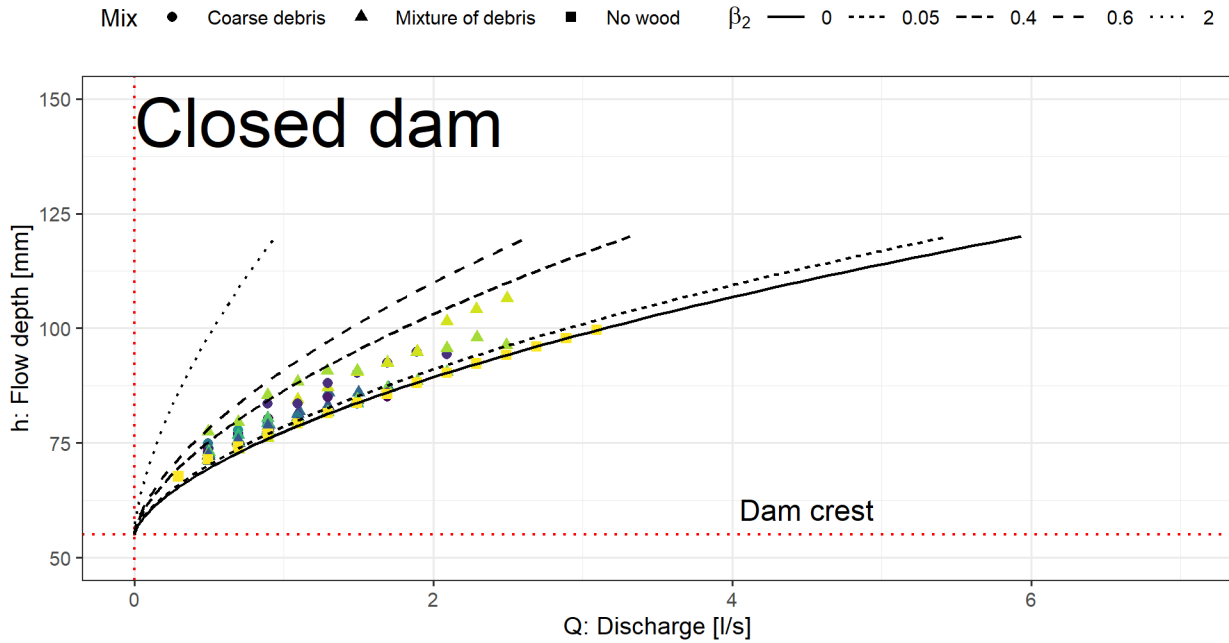

Fig. S 4: Graph flow depth against discharge on Closed dam, measurements and various values of  $\beta_2$

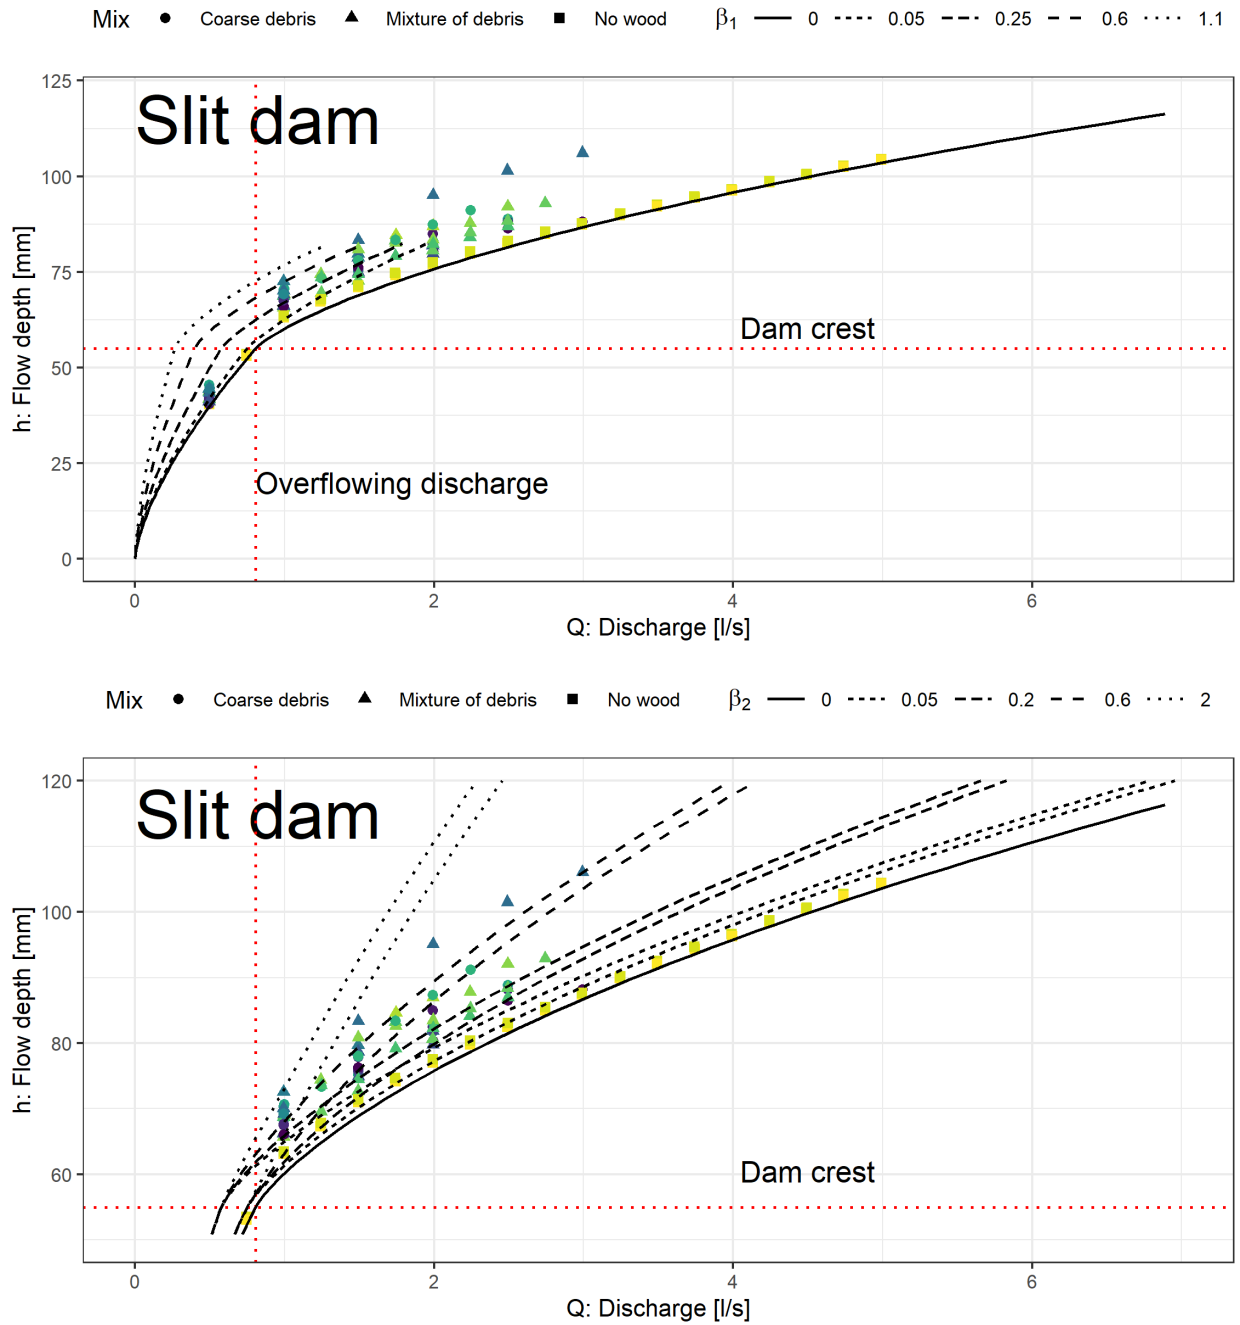

20 Fig. S 5: Graph flow depth against discharge on slit dam, measurements and various values of  $\beta_1$  (upper panel) and  $\beta_2$  (lower panel with zoom on overflowing measurements)

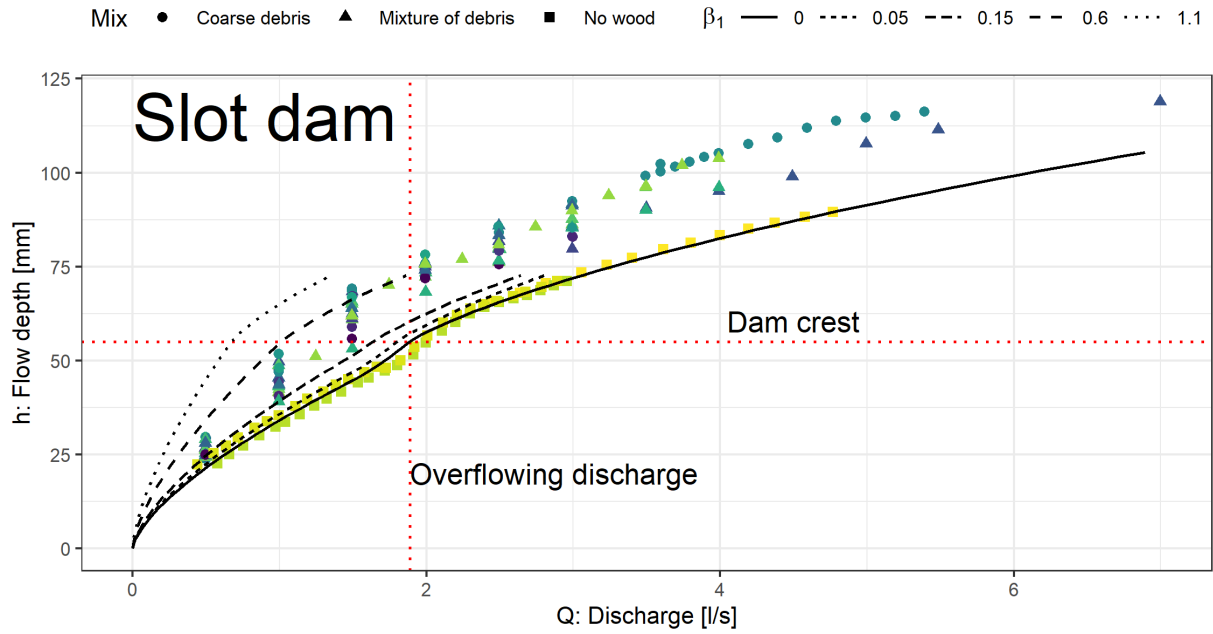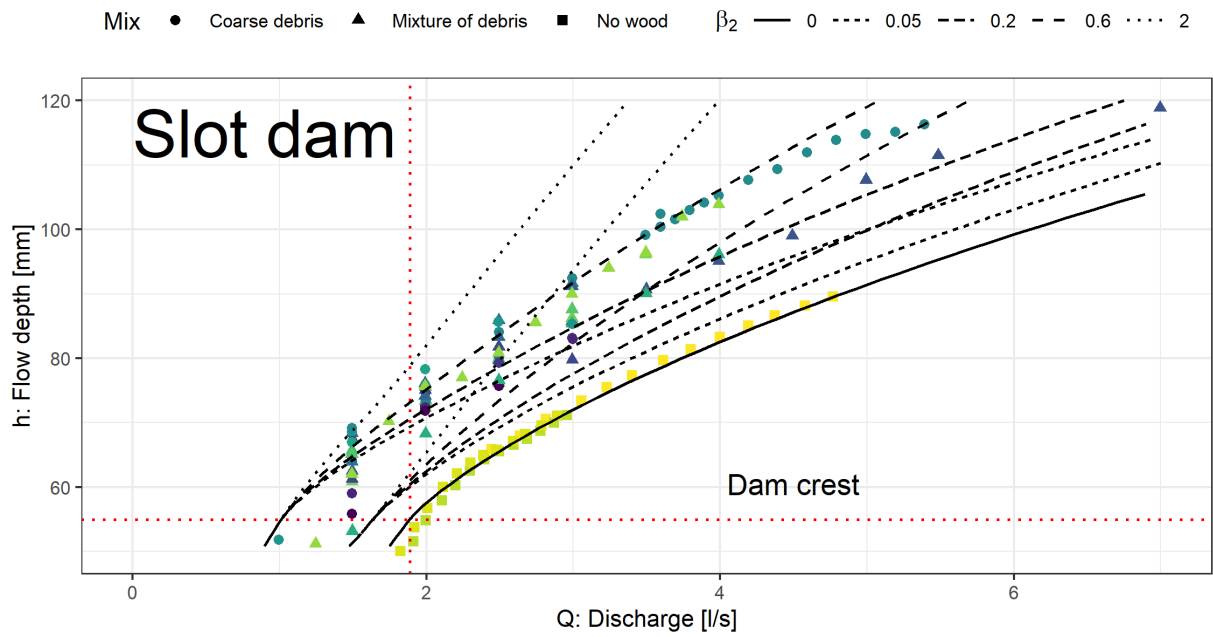

25 Fig. S 6: Graph flow depth against discharge on slot dam, measurements and various values of  $\beta_1$  (upper panel) and  $\beta_2$  (lower panel with zoom on overflowing measurements)

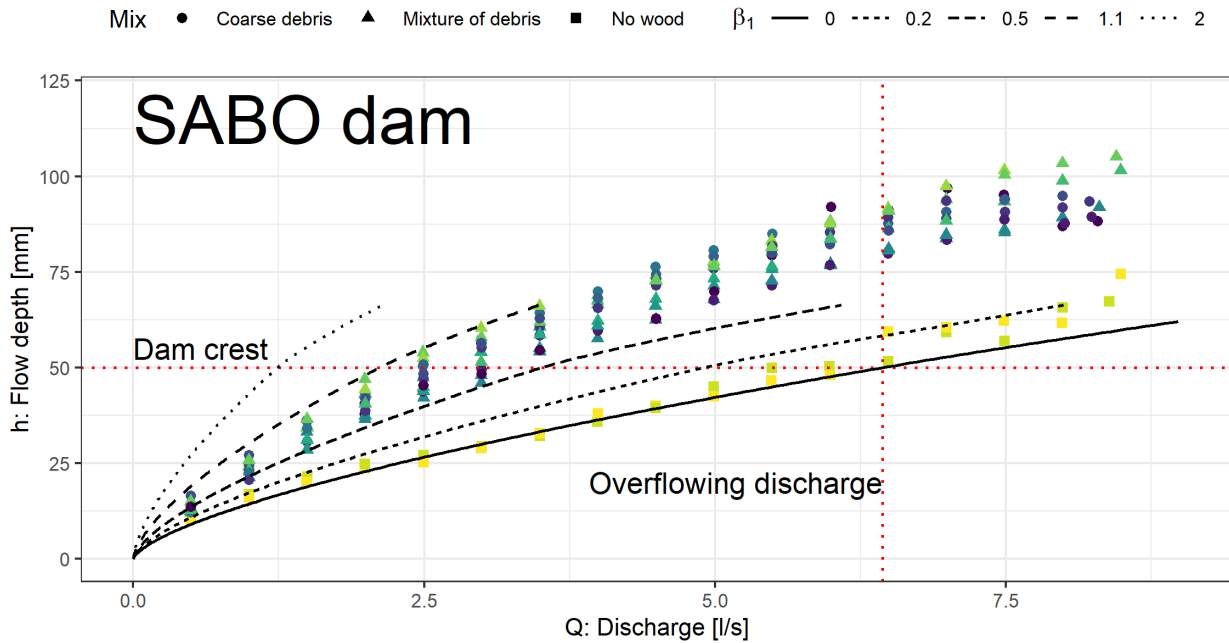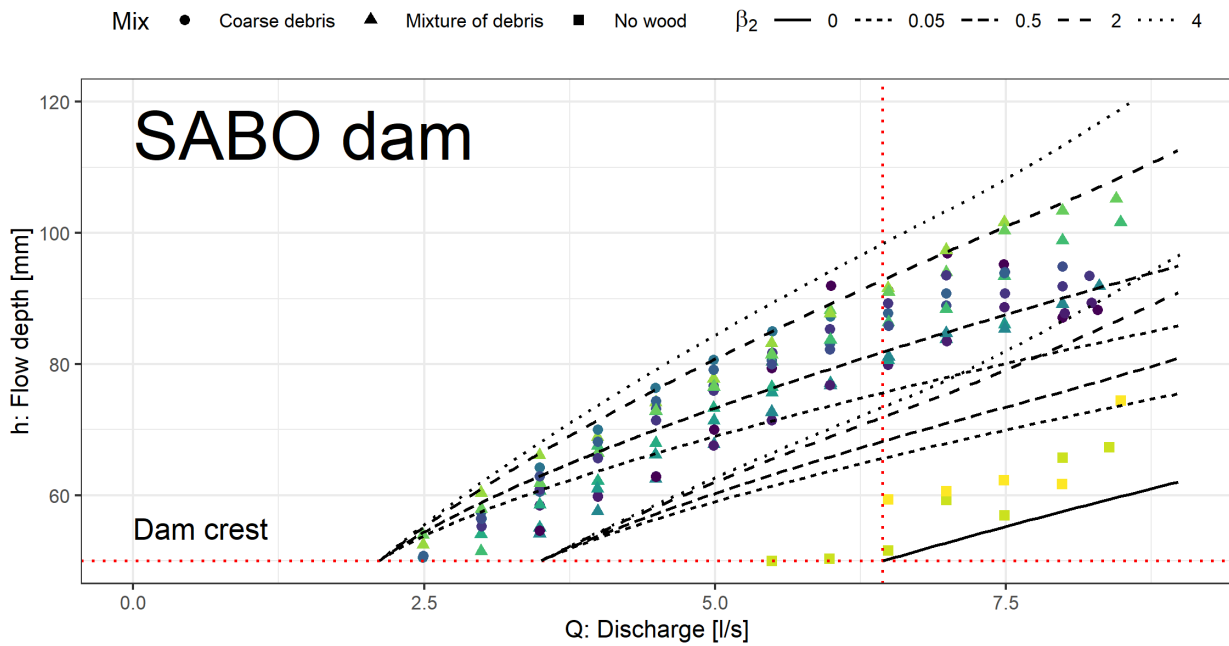

Fig. S 7: Graph flow depth against discharge on SABO dam, measurements and various values of  $\beta_1$  (upper panel) and  $\beta_2$  (lower panel with zoom on overflowing measurements)

### 3 Experimental data

Table of data with, Dam (dam type), #Run (Mixture code and repetition number), Q (water discharge in l/s), h (measured water depth in mm),  $m_{LW}$  (mass of LW released in kg),  $h_0$  (computed water depth without LW in mm) and  $R_{LW}$  (fraction of LW released).

| Dam    | #Run     | Q   | h   | $m_{LW}$ | $h_0$ | $R_{LW}$ |
|--------|----------|-----|-----|----------|-------|----------|
| Closed | NoWood 1 | 0.3 | 68  | NA       | 65    | NA       |
| Closed | NoWood 1 | 0.5 | 71  | NA       | 69    | NA       |
| Closed | NoWood 1 | 0.7 | 74  | NA       | 73    | NA       |
| Closed | NoWood 1 | 0.9 | 77  | NA       | 76    | NA       |
| Closed | NoWood 1 | 1.1 | 79  | NA       | 79    | NA       |
| Closed | NoWood 1 | 1.3 | 82  | NA       | 81    | NA       |
| Closed | NoWood 1 | 1.5 | 84  | NA       | 84    | NA       |
| Closed | NoWood 1 | 1.7 | 86  | NA       | 86    | NA       |
| Closed | NoWood 1 | 1.9 | 88  | NA       | 88    | NA       |
| Closed | NoWood 1 | 2.1 | 90  | NA       | 90    | NA       |
| Closed | NoWood 1 | 2.3 | 92  | NA       | 92    | NA       |
| Closed | NoWood 1 | 2.5 | 94  | NA       | 94    | NA       |
| Closed | NoWood 1 | 2.7 | 96  | NA       | 96    | NA       |
| Closed | NoWood 1 | 2.9 | 98  | NA       | 98    | NA       |
| Closed | NoWood 1 | 3.1 | 100 | NA       | 100   | NA       |
| Closed | Mix1A 1  | 0.5 | 73  | 34       | 69    | 0.04     |
| Closed | Mix1A 1  | 0.7 | 77  | 62       | 73    | 0.08     |
| Closed | Mix1A 1  | 0.9 | 80  | 22       | 76    | 0.03     |
| Closed | Mix1A 1  | 1.1 | 79  | 148      | 79    | 0.19     |
| Closed | Mix1A 1  | 1.3 | 82  | 154      | 81    | 0.19     |
| Closed | Mix1A 1  | 1.5 | 84  | 222      | 84    | 0.28     |
| Closed | Mix1A 1  | 1.7 | 85  | 118      | 86    | 0.15     |
| Closed | Mix1A 2  | 0.5 | 74  | 6        | 69    | 0.01     |
| Closed | Mix1A 2  | 0.7 | 77  | 8        | 73    | 0.01     |
| Closed | Mix1A 2  | 0.9 | 80  | 88       | 76    | 0.11     |
| Closed | Mix1A 2  | 1.1 | 80  | 36       | 79    | 0.04     |
| Closed | Mix1A 2  | 1.3 | 85  | 62       | 81    | 0.08     |
| Closed | Mix1A 2  | 1.5 | 84  | 102      | 84    | 0.12     |
| Closed | Mix1A 2  | 1.7 | 86  | 482      | 86    | 0.59     |
| Closed | Mix1A 3  | 0.5 | 73  | 30       | 69    | 0.04     |
| Closed | Mix1A 3  | 0.7 | 75  | 2        | 73    | 0.00     |
| Closed | Mix1A 3  | 0.9 | 84  | 46       | 76    | 0.06     |
| Closed | Mix1A 3  | 1.1 | 84  | 0        | 79    | -        |
| Closed | Mix1A 3  | 1.3 | 88  | 6        | 81    | 0.01     |
| Closed | Mix1A 3  | 1.5 | 90  | 18       | 84    | 0.02     |
| Closed | Mix1A 3  | 1.7 | 93  | 8        | 86    | 0.01     |
| Closed | Mix1A 3  | 1.9 | 95  | 162      | 88    | 0.19     |
| Closed | Mix1A 3  | 2.1 | 94  | 534      | 90    | 0.64     |
| Closed | Mix1B 1  | 0.5 | 72  | 66       | 69    | 0.07     |
| Closed | Mix1B 1  | 0.7 | 75  | 0        | 73    | -        |
| Closed | Mix1B 1  | 0.9 | 78  | 0        | 76    | -        |
| Closed | Mix1B 1  | 1.1 | 81  | 550      | 79    | 0.60     |
| Closed | Mix1B 1  | 1.3 | 83  | 210      | 81    | 0.23     |

| Dam    | #Run    | Q   | h  | $m_{LW}$ | $h_0$ | $R_{LW}$ |
|--------|---------|-----|----|----------|-------|----------|
| Closed | Mix1B 2 | 0.5 | 72 | 20       | 69    | 0.02     |
| Closed | Mix1B 2 | 0.7 | 76 | 26       | 73    | 0.03     |
| Closed | Mix1B 2 | 0.9 | 79 | 0        | 76    | -        |
| Closed | Mix1B 2 | 1.1 | 81 | 176      | 79    | 0.19     |
| Closed | Mix1B 2 | 1.3 | 83 | 10       | 81    | 0.01     |
| Closed | Mix1B 2 | 1.5 | 84 | 638      | 84    | 0.69     |
| Closed | Mix1B 3 | 0.5 | 71 | 12       | 70    | 0.01     |
| Closed | Mix1B 3 | 0.7 | 75 | 108      | 73    | 0.12     |
| Closed | Mix1B 3 | 0.9 | 79 | 4        | 76    | 0.00     |
| Closed | Mix1B 3 | 1.1 | 82 | 54       | 79    | 0.06     |
| Closed | Mix1B 3 | 1.3 | 86 | 18       | 81    | 0.02     |
| Closed | Mix1B 3 | 1.5 | 86 | 0        | 84    | -        |
| Closed | Mix1B 3 | 1.7 | 87 | 716      | 86    | 0.78     |
| Closed | Mix2A 1 | 0.5 | 75 | 40       | 69    | 0.04     |
| Closed | Mix2A 1 | 0.7 | 76 | 132      | 73    | 0.14     |
| Closed | Mix2A 1 | 0.9 | 79 | 6        | 76    | 0.01     |
| Closed | Mix2A 1 | 1.1 | 81 | 22       | 79    | 0.02     |
| Closed | Mix2A 1 | 1.3 | 82 | 4        | 81    | 0.00     |
| Closed | Mix2A 1 | 1.5 | 84 | 660      | 84    | 0.72     |
| Closed | Mix2A 2 | 0.5 | 74 | 66       | 69    | 0.07     |
| Closed | Mix2A 2 | 0.7 | 74 | 74       | 73    | 0.08     |
| Closed | Mix2A 2 | 0.9 | 77 | 190      | 76    | 0.20     |
| Closed | Mix2A 2 | 1.1 | 80 | 542      | 79    | 0.58     |
| Closed | Mix2A 3 | 0.5 | 74 | 20       | 69    | 0.02     |
| Closed | Mix2A 3 | 0.7 | 78 | 60       | 73    | 0.06     |
| Closed | Mix2A 3 | 0.9 | 77 | 830      | 76    | 0.88     |
| Closed | Mix2B 1 | 0.5 | 73 | 8        | 69    | 0.01     |
| Closed | Mix2B 1 | 0.7 | 76 | 16       | 73    | 0.02     |
| Closed | Mix2B 1 | 0.9 | 78 | 16       | 76    | 0.02     |
| Closed | Mix2B 1 | 1.1 | 80 | 92       | 79    | 0.12     |
| Closed | Mix2B 1 | 1.3 | 82 | 0        | 81    | -        |
| Closed | Mix2B 1 | 1.5 | 84 | 604      | 84    | 0.81     |
| Closed | Mix2B 2 | 0.5 | 73 | 158      | 69    | 0.21     |
| Closed | Mix2B 2 | 0.7 | 77 | 0        | 73    | -        |
| Closed | Mix2B 2 | 0.9 | 79 | 2        | 76    | 0.00     |
| Closed | Mix2B 2 | 1.1 | 80 | 598      | 79    | 0.78     |
| Closed | Mix2B 3 | 0.5 | 71 | 26       | 69    | 0.03     |
| Closed | Mix2B 3 | 0.7 | 76 | 234      | 73    | 0.30     |
| Closed | Mix2B 3 | 0.9 | 80 | 496      | 76    | 0.63     |
| Closed | Mix3B 1 | 0.5 | 73 | 8        | 69    | 0.00     |
| Closed | Mix3B 1 | 0.7 | 75 | 158      | 73    | 0.07     |
| Closed | Mix3B 1 | 0.9 | 78 | 0        | 76    | -        |
| Closed | Mix3B 1 | 1.1 | 80 | 0        | 79    | -        |



| Dam    | #Run     | Q   | h   | m <sub>LW</sub> | h <sub>0</sub> | R <sub>LW</sub> |
|--------|----------|-----|-----|-----------------|----------------|-----------------|
| Closed | Mix3B 1  | 1.3 | 82  | 62              | 81             | 0.03            |
| Closed | Mix3B 1  | 1.5 | 84  | 954             | 84             | 0.40            |
| Closed | Mix3B 1  | 1.7 | 87  | 2               | 86             | 0.00            |
| Closed | Mix3B 1  | 1.9 | 89  | 242             | 88             | 0.10            |
| Closed | Mix3B 1  | 2.1 | 90  | 922             | 90             | 0.39            |
| Closed | Mix3B 2  | 0.5 | 78  | 10              | 69             | 0.00            |
| Closed | Mix3B 2  | 0.7 | 80  | 0               | 73             | -               |
| Closed | Mix3B 2  | 0.9 | 86  | 6               | 76             | 0.00            |
| Closed | Mix3B 2  | 1.1 | 88  | 32              | 79             | 0.01            |
| Closed | Mix3B 2  | 1.3 | 91  | 42              | 81             | 0.02            |
| Closed | Mix3B 2  | 1.5 | 91  | 60              | 84             | 0.03            |
| Closed | Mix3B 2  | 1.7 | 93  | 188             | 86             | 0.08            |
| Closed | Mix3B 2  | 1.9 | 95  | 14              | 88             | 0.01            |
| Closed | Mix3B 2  | 2.1 | 96  | 0               | 90             | -               |
| Closed | Mix3B 2  | 2.3 | 98  | 0               | 92             | -               |
| Closed | Mix3B 2  | 2.5 | 96  | 2056            | 94             | 0.85            |
| Closed | Mix3B 3  | 0.5 | 72  | 22              | 69             | 0.01            |
| Closed | Mix3B 3  | 0.7 | 74  | 0               | 73             | -               |
| Closed | Mix3B 3  | 0.9 | 76  | 0               | 76             | -               |
| Closed | Mix3B 3  | 1.1 | 84  | 38              | 79             | 0.02            |
| Closed | Mix3B 3  | 1.3 | 87  | 0               | 81             | -               |
| Closed | Mix3B 3  | 1.5 | 90  | 2               | 84             | 0.00            |
| Closed | Mix3B 3  | 1.7 | 92  | 2               | 86             | 0.00            |
| Closed | Mix3B 3  | 1.9 | 95  | 26              | 88             | 0.01            |
| Closed | Mix3B 3  | 2.1 | 102 | 2               | 90             | 0.00            |
| Closed | Mix3B 3  | 2.3 | 104 | 2               | 92             | 0.00            |
| Closed | Mix3B 3  | 2.5 | 107 | 2334            | 94             | 0.93            |
| Slit   | NoWood 1 | 0.5 | 41  | NA              | 40             | NA              |
| Slit   | NoWood 1 | 0.7 | 54  | NA              | 52             | NA              |
| Slit   | NoWood 1 | 1.0 | 64  | NA              | 60             | NA              |
| Slit   | NoWood 1 | 1.2 | 68  | NA              | 65             | NA              |
| Slit   | NoWood 1 | 1.5 | 71  | NA              | 69             | NA              |
| Slit   | NoWood 1 | 1.7 | 75  | NA              | 72             | NA              |
| Slit   | NoWood 1 | 2.0 | 78  | NA              | 76             | NA              |
| Slit   | NoWood 1 | 2.2 | 80  | NA              | 79             | NA              |
| Slit   | NoWood 1 | 2.5 | 83  | NA              | 82             | NA              |
| Slit   | NoWood 1 | 2.7 | 86  | NA              | 84             | NA              |
| Slit   | NoWood 1 | 3.0 | 88  | NA              | 87             | NA              |
| Slit   | NoWood 1 | 3.2 | 90  | NA              | 89             | NA              |
| Slit   | NoWood 1 | 3.5 | 93  | NA              | 91             | NA              |
| Slit   | NoWood 1 | 3.7 | 95  | NA              | 94             | NA              |
| Slit   | NoWood 1 | 4.0 | 97  | NA              | 96             | NA              |
| Slit   | NoWood 1 | 4.2 | 99  | NA              | 98             | NA              |
| Slit   | NoWood 1 | 4.5 | 101 | NA              | 100            | NA              |
| Slit   | NoWood 1 | 4.7 | 103 | NA              | 102            | NA              |
| Slit   | NoWood 1 | 5.0 | 104 | NA              | 104            | NA              |
| Slit   | NoWood 2 | 0.5 | 40  | NA              | 40             | NA              |
| Slit   | NoWood 2 | 0.7 | 53  | NA              | 52             | NA              |
| Slit   | NoWood 2 | 1.0 | 63  | NA              | 60             | NA              |
| Slit   | NoWood 2 | 1.2 | 67  | NA              | 65             | NA              |

| Dam  | #Run     | Q   | h   | m <sub>LW</sub> | h <sub>0</sub> | R <sub>LW</sub> |
|------|----------|-----|-----|-----------------|----------------|-----------------|
| Slit | NoWood 2 | 1.5 | 71  | NA              | 69             | NA              |
| Slit | NoWood 2 | 1.7 | 74  | NA              | 72             | NA              |
| Slit | NoWood 2 | 2.0 | 77  | NA              | 76             | NA              |
| Slit | NoWood 2 | 2.2 | 80  | NA              | 79             | NA              |
| Slit | NoWood 2 | 2.5 | 83  | NA              | 81             | NA              |
| Slit | NoWood 2 | 2.7 | 85  | NA              | 84             | NA              |
| Slit | NoWood 2 | 3.0 | 87  | NA              | 87             | NA              |
| Slit | NoWood 2 | 3.2 | 90  | NA              | 89             | NA              |
| Slit | NoWood 2 | 3.5 | 92  | NA              | 91             | NA              |
| Slit | NoWood 2 | 3.7 | 94  | NA              | 94             | NA              |
| Slit | NoWood 2 | 4.0 | 96  | NA              | 96             | NA              |
| Slit | NoWood 2 | 4.2 | 99  | NA              | 98             | NA              |
| Slit | NoWood 2 | 4.5 | 101 | NA              | 100            | NA              |
| Slit | NoWood 2 | 4.7 | 102 | NA              | 102            | NA              |
| Slit | NoWood 2 | 5.0 | 104 | NA              | 104            | NA              |
| Slit | Mix1A 1  | 0.5 | 43  | 0               | 40             | -               |
| Slit | Mix1A 1  | 1.0 | 66  | 0               | 60             | -               |
| Slit | Mix1A 1  | 1.5 | 76  | 30              | 69             | 0.03            |
| Slit | Mix1A 1  | 2.0 | 80  | 174             | 76             | 0.20            |
| Slit | Mix1A 1  | 2.5 | 87  | 16              | 82             | 0.02            |
| Slit | Mix1A 1  | 3.0 | 88  | 606             | 87             | 0.70            |
| Slit | Mix1A 2  | 0.5 | 41  | 0               | 40             | -               |
| Slit | Mix1A 2  | 1.0 | 68  | 6               | 60             | 0.01            |
| Slit | Mix1A 2  | 1.5 | 78  | 76              | 69             | 0.09            |
| Slit | Mix1A 2  | 2.0 | 85  | 24              | 76             | 0.03            |
| Slit | Mix1A 3  | 0.5 | 42  | 0               | 40             | -               |
| Slit | Mix1A 3  | 1.0 | 68  | 6               | 60             | 0.01            |
| Slit | Mix1A 3  | 1.5 | 76  | 30              | 69             | 0.03            |
| Slit | Mix1A 3  | 2.0 | 83  | 88              | 76             | 0.10            |
| Slit | Mix1A 3  | 2.5 | 88  | 64              | 82             | 0.07            |
| Slit | Mix1A 4  | 0.5 | 43  | 0               | 40             | -               |
| Slit | Mix1A 4  | 1.0 | 69  | 0               | 60             | -               |
| Slit | Mix1A 4  | 1.5 | 76  | 66              | 69             | 0.07            |
| Slit | Mix1A 4  | 2.0 | 82  | 314             | 76             | 0.35            |
| Slit | Mix1B 1  | 0.5 | 41  | 0               | 40             | -               |
| Slit | Mix1B 1  | 1.0 | 66  | 0               | 60             | -               |
| Slit | Mix1B 1  | 1.5 | 75  | 36              | 69             | 0.04            |
| Slit | Mix1B 1  | 2.0 | 80  | 420             | 76             | 0.43            |
| Slit | Mix1B 2  | 0.5 | 44  | 0               | 40             | -               |
| Slit | Mix1B 2  | 1.0 | 69  | 0               | 60             | -               |
| Slit | Mix1B 2  | 1.5 | 79  | 60              | 69             | 0.06            |
| Slit | Mix1B 2  | 2.0 | 82  | 196             | 76             | 0.20            |
| Slit | Mix1B 3  | 0.5 | 43  | 0               | 40             | -               |
| Slit | Mix1B 3  | 1.0 | 70  | 6               | 60             | 0.01            |
| Slit | Mix1B 3  | 1.5 | 83  | 0               | 69             | -               |
| Slit | Mix1B 3  | 2.0 | 95  | 0               | 76             | -               |
| Slit | Mix1B 3  | 2.5 | 102 | 82              | 81             | 0.08            |
| Slit | Mix1B 3  | 3.0 | 106 | 156             | 87             | 0.16            |
| Slit | Mix1B 4  | 0.5 | 44  | 0               | 40             | -               |
| Slit | Mix1B 4  | 1.0 | 73  | 0               | 60             | -               |

| Dam  | #Run    | Q   | h  | m <sub>LW</sub> | h <sub>0</sub> | R <sub>LW</sub> |
|------|---------|-----|----|-----------------|----------------|-----------------|
| Slit | Mix1B 4 | 1.5 | 80 | 34              | 69             | 0.03            |
| Slit | Mix2A 1 | 0.5 | 45 | 0               | 40             | -               |
| Slit | Mix2A 1 | 1.0 | 69 | 6               | 60             | 0.01            |
| Slit | Mix2A 1 | 1.5 | 76 | 64              | 69             | 0.07            |
| Slit | Mix2A 1 | 2.0 | 82 | 846             | 76             | 0.88            |
| Slit | Mix2A 2 | 0.5 | 44 | 0               | 40             | -               |
| Slit | Mix2A 2 | 1.0 | 70 | 0               | 60             | -               |
| Slit | Mix2A 2 | 1.5 | 78 | 38              | 69             | 0.04            |
| Slit | Mix2A 3 | 0.5 | 46 | 0               | 40             | -               |
| Slit | Mix2A 3 | 1.0 | 71 | 0               | 60             | -               |
| Slit | Mix2A 3 | 1.5 | 75 | 74              | 69             | 0.08            |
| Slit | Mix2A 3 | 2.0 | 83 | 272             | 76             | 0.28            |
| Slit | Mix2A 3 | 2.5 | 89 | 72              | 82             | 0.07            |
| Slit | Mix2A 4 | 0.5 | 45 | 0               | 40             | -               |
| Slit | Mix2A 4 | 1.0 | 68 | 0               | 60             | -               |
| Slit | Mix2A 4 | 1.2 | 73 | 0               | 65             | -               |
| Slit | Mix2A 4 | 1.5 | 78 | 8               | 69             | 0.01            |
| Slit | Mix2A 4 | 1.7 | 83 | 4               | 72             | 0.00            |
| Slit | Mix2A 4 | 2.0 | 87 | 8               | 76             | 0.01            |
| Slit | Mix2A 4 | 2.2 | 91 | 0               | 79             | -               |
| Slit | Mix2B 1 | 0.5 | 42 | 0               | 40             | -               |
| Slit | Mix2B 1 | 1.0 | 69 | 0               | 60             | -               |
| Slit | Mix2B 1 | 1.2 | 74 | 14              | 65             | 0.02            |
| Slit | Mix2B 1 | 1.5 | 75 | 20              | 69             | 0.03            |
| Slit | Mix2B 1 | 1.7 | 79 | 94              | 72             | 0.13            |
| Slit | Mix2B 1 | 2.0 | 82 | 0               | 76             | -               |
| Slit | Mix2B 1 | 2.2 | 84 | 32              | 79             | 0.04            |
| Slit | Mix2B 1 | 2.5 | 87 | 534             | 82             | 0.74            |
| Slit | Mix2B 2 | 0.5 | 44 | 0               | 40             | -               |
| Slit | Mix2B 2 | 1.0 | 66 | 0               | 60             | -               |
| Slit | Mix2B 2 | 1.2 | 70 | 20              | 65             | 0.03            |
| Slit | Mix2B 2 | 1.5 | 73 | 32              | 69             | 0.04            |
| Slit | Mix2B 2 | 1.7 | 83 | 14              | 72             | 0.02            |
| Slit | Mix2B 2 | 2.0 | 81 | 38              | 76             | 0.05            |
| Slit | Mix2B 2 | 2.2 | 85 | 12              | 79             | 0.02            |
| Slit | Mix2B 2 | 2.5 | 88 | 0               | 81             | -               |
| Slit | Mix2B 2 | 2.7 | 93 | 24              | 84             | 0.03            |
| Slit | Mix2B 3 | 0.5 | 42 | 0               | 40             | -               |
| Slit | Mix2B 3 | 1.0 | 66 | 0               | 60             | -               |
| Slit | Mix2B 3 | 1.2 | 74 | 0               | 65             | -               |
| Slit | Mix2B 3 | 1.5 | 81 | 0               | 69             | -               |
| Slit | Mix2B 3 | 1.7 | 83 | 34              | 72             | 0.04            |
| Slit | Mix2B 3 | 2.0 | 84 | 0               | 76             | -               |
| Slit | Mix2B 3 | 2.2 | 88 | 46              | 79             | 0.06            |
| Slit | Mix2B 3 | 2.5 | 92 | 106             | 82             | 0.13            |
| Slit | Mix2B 4 | 0.5 | 45 | 0               | 40             | -               |
| Slit | Mix2B 4 | 1.0 | 69 | 8               | 60             | 0.01            |
| Slit | Mix2B 4 | 1.5 | 81 | 42              | 69             | 0.05            |
| Slit | Mix2B 4 | 1.7 | 85 | 4               | 72             | 0.01            |
| Slit | Mix2B 4 | 2.0 | 87 | 294             | 76             | 0.36            |

| Dam  | #Run     | Q   | h  | m <sub>LW</sub> | h <sub>0</sub> | R <sub>LW</sub> |
|------|----------|-----|----|-----------------|----------------|-----------------|
| Slot | NoWood 1 | 0.6 | 23 | NA              | 24             | NA              |
| Slot | NoWood 1 | 0.7 | 25 | NA              | 26             | NA              |
| Slot | NoWood 1 | 0.8 | 27 | NA              | 28             | NA              |
| Slot | NoWood 1 | 0.9 | 30 | NA              | 31             | NA              |
| Slot | NoWood 1 | 1.0 | 32 | NA              | 33             | NA              |
| Slot | NoWood 1 | 1.0 | 34 | NA              | 35             | NA              |
| Slot | NoWood 1 | 1.1 | 36 | NA              | 37             | NA              |
| Slot | NoWood 1 | 1.2 | 38 | NA              | 39             | NA              |
| Slot | NoWood 1 | 1.3 | 40 | NA              | 41             | NA              |
| Slot | NoWood 1 | 1.4 | 42 | NA              | 43             | NA              |
| Slot | NoWood 1 | 1.5 | 44 | NA              | 45             | NA              |
| Slot | NoWood 1 | 1.6 | 46 | NA              | 47             | NA              |
| Slot | NoWood 1 | 1.7 | 47 | NA              | 50             | NA              |
| Slot | NoWood 1 | 1.8 | 49 | NA              | 52             | NA              |
| Slot | NoWood 1 | 1.9 | 52 | NA              | 56             | NA              |
| Slot | NoWood 1 | 2.0 | 55 | NA              | 57             | NA              |
| Slot | NoWood 1 | 2.1 | 58 | NA              | 60             | NA              |
| Slot | NoWood 1 | 2.2 | 60 | NA              | 61             | NA              |
| Slot | NoWood 1 | 2.3 | 63 | NA              | 63             | NA              |
| Slot | NoWood 1 | 2.4 | 64 | NA              | 64             | NA              |
| Slot | NoWood 1 | 2.5 | 66 | NA              | 66             | NA              |
| Slot | NoWood 1 | 2.6 | 67 | NA              | 67             | NA              |
| Slot | NoWood 1 | 2.7 | 67 | NA              | 68             | NA              |
| Slot | NoWood 1 | 2.8 | 69 | NA              | 69             | NA              |
| Slot | NoWood 1 | 2.9 | 70 | NA              | 70             | NA              |
| Slot | NoWood 1 | 3.0 | 71 | NA              | 72             | NA              |
| Slot | NoWood 2 | 0.4 | 22 | NA              | 20             | NA              |
| Slot | NoWood 2 | 0.6 | 25 | NA              | 23             | NA              |
| Slot | NoWood 2 | 0.6 | 27 | NA              | 25             | NA              |
| Slot | NoWood 2 | 0.7 | 30 | NA              | 27             | NA              |
| Slot | NoWood 2 | 0.8 | 32 | NA              | 30             | NA              |
| Slot | NoWood 2 | 0.9 | 34 | NA              | 32             | NA              |
| Slot | NoWood 2 | 1.0 | 35 | NA              | 34             | NA              |
| Slot | NoWood 2 | 1.1 | 38 | NA              | 37             | NA              |
| Slot | NoWood 2 | 1.2 | 40 | NA              | 38             | NA              |
| Slot | NoWood 2 | 1.3 | 42 | NA              | 41             | NA              |
| Slot | NoWood 2 | 1.4 | 44 | NA              | 42             | NA              |
| Slot | NoWood 2 | 1.5 | 45 | NA              | 44             | NA              |
| Slot | NoWood 2 | 1.6 | 47 | NA              | 46             | NA              |
| Slot | NoWood 2 | 1.7 | 48 | NA              | 49             | NA              |
| Slot | NoWood 2 | 1.7 | 48 | NA              | 50             | NA              |
| Slot | NoWood 2 | 1.8 | 50 | NA              | 53             | NA              |
| Slot | NoWood 2 | 1.9 | 54 | NA              | 56             | NA              |
| Slot | NoWood 2 | 2.0 | 57 | NA              | 58             | NA              |
| Slot | NoWood 2 | 2.1 | 60 | NA              | 60             | NA              |
| Slot | NoWood 2 | 2.2 | 62 | NA              | 61             | NA              |
| Slot | NoWood 2 | 2.3 | 64 | NA              | 63             | NA              |
| Slot | NoWood 2 | 2.4 | 65 | NA              | 64             | NA              |
| Slot | NoWood 2 | 2.5 | 66 | NA              | 65             | NA              |
| Slot | NoWood 2 | 2.6 | 67 | NA              | 67             | NA              |

| Dam  | #Run     | Q   | h  | m <sub>LW</sub> | h <sub>0</sub> | R <sub>LW</sub> |
|------|----------|-----|----|-----------------|----------------|-----------------|
| Slot | NoWood 2 | 2.7 | 68 | NA              | 68             | NA              |
| Slot | NoWood 2 | 2.8 | 70 | NA              | 69             | NA              |
| Slot | NoWood 2 | 2.9 | 71 | NA              | 71             | NA              |
| Slot | NoWood 3 | 2.4 | 66 | NA              | 65             | NA              |
| Slot | NoWood 3 | 2.6 | 68 | NA              | 67             | NA              |
| Slot | NoWood 3 | 2.8 | 71 | NA              | 70             | NA              |
| Slot | NoWood 3 | 3.1 | 73 | NA              | 73             | NA              |
| Slot | NoWood 3 | 3.2 | 76 | NA              | 75             | NA              |
| Slot | NoWood 3 | 3.4 | 77 | NA              | 77             | NA              |
| Slot | NoWood 3 | 3.6 | 80 | NA              | 79             | NA              |
| Slot | NoWood 3 | 3.8 | 81 | NA              | 81             | NA              |
| Slot | NoWood 3 | 4.0 | 83 | NA              | 83             | NA              |
| Slot | NoWood 3 | 4.2 | 85 | NA              | 84             | NA              |
| Slot | NoWood 3 | 4.4 | 87 | NA              | 86             | NA              |
| Slot | NoWood 3 | 4.6 | 88 | NA              | 88             | NA              |
| Slot | NoWood 3 | 4.8 | 90 | NA              | 89             | NA              |
| Slot | Mix1A 1  | 0.5 | 25 | 0               | 21             | -               |
| Slot | Mix1A 1  | 1.0 | 40 | 0               | 34             | -               |
| Slot | Mix1A 1  | 1.5 | 56 | 0               | 45             | -               |
| Slot | Mix1A 1  | 2.0 | 72 | 16              | 57             | 0.02            |
| Slot | Mix1A 1  | 2.5 | 76 | 392             | 66             | 0.44            |
| Slot | Mix1A 2  | 0.5 | 25 | 0               | 21             | -               |
| Slot | Mix1A 2  | 1.0 | 48 | 16              | 34             | 0.02            |
| Slot | Mix1A 2  | 1.5 | 65 | 0               | 45             | -               |
| Slot | Mix1A 2  | 2.0 | 73 | 76              | 57             | 0.08            |
| Slot | Mix1A 2  | 2.5 | 80 | 252             | 65             | 0.27            |
| Slot | Mix1A 3  | 0.5 | 25 | 0               | 21             | -               |
| Slot | Mix1A 3  | 1.0 | 41 | 0               | 34             | -               |
| Slot | Mix1A 3  | 1.5 | 59 | 0               | 45             | -               |
| Slot | Mix1A 3  | 2.0 | 72 | 10              | 57             | 0.01            |
| Slot | Mix1A 3  | 2.5 | 79 | 400             | 66             | 0.42            |
| Slot | Mix1A 3  | 3.0 | 83 | 454             | 72             | 0.48            |
| Slot | Mix1A 4  | 0.5 | 25 | 0               | 21             | -               |
| Slot | Mix1A 4  | 1.0 | 44 | 0               | 34             | -               |
| Slot | Mix1A 4  | 1.5 | 67 | 0               | 45             | -               |
| Slot | Mix1A 4  | 2.0 | 75 | 96              | 57             | 0.10            |
| Slot | Mix1A 4  | 2.5 | 79 | 226             | 66             | 0.24            |
| Slot | Mix1A 4  | 3.0 | 83 | 586             | 72             | 0.61            |
| Slot | Mix1B 1  | 0.5 | 27 | 0               | 21             | -               |
| Slot | Mix1B 1  | 1.0 | 44 | 0               | 34             | -               |
| Slot | Mix1B 1  | 1.5 | 61 | 0               | 45             | -               |
| Slot | Mix1B 1  | 2.0 | 75 | 0               | 57             | -               |
| Slot | Mix1B 1  | 2.5 | 82 | 34              | 66             | 0.03            |
| Slot | Mix1B 1  | 3.0 | 80 | 924             | 72             | 0.94            |
| Slot | Mix1B 2  | 0.5 | 25 | 0               | 21             | -               |
| Slot | Mix1B 2  | 1.0 | 50 | 16              | 34             | 0.02            |
| Slot | Mix1B 2  | 1.5 | 68 | 20              | 45             | 0.02            |
| Slot | Mix1B 2  | 2.0 | 76 | 62              | 57             | 0.06            |
| Slot | Mix1B 2  | 2.5 | 80 | 138             | 65             | 0.14            |
| Slot | Mix1B 2  | 3.0 | 86 | 26              | 72             | 0.03            |

| Dam  | #Run    | Q   | h   | m <sub>LW</sub> | h <sub>0</sub> | R <sub>LW</sub> |
|------|---------|-----|-----|-----------------|----------------|-----------------|
| Slot | Mix1B 2 | 3.5 | 91  | 94              | 78             | 0.10            |
| Slot | Mix1B 2 | 4.0 | 95  | 64              | 82             | 0.07            |
| Slot | Mix1B 2 | 4.5 | 99  | 14              | 87             | 0.01            |
| Slot | Mix1B 2 | 5.0 | 108 | 24              | 91             | 0.03            |
| Slot | Mix1B 2 | 5.5 | 112 | 30              | 95             | 0.03            |
| Slot | Mix1B 2 | 7.0 | 119 | 422             | 106            | 0.44            |
| Slot | Mix1B 3 | 0.5 | 28  | 0               | 21             | -               |
| Slot | Mix1B 3 | 1.0 | 46  | 0               | 34             | -               |
| Slot | Mix1B 3 | 1.5 | 63  | 0               | 45             | -               |
| Slot | Mix1B 3 | 2.0 | 74  | 0               | 57             | -               |
| Slot | Mix1B 3 | 2.5 | 83  | 10              | 66             | 0.01            |
| Slot | Mix1B 3 | 3.0 | 91  | 6               | 72             | 0.01            |
| Slot | Mix1B 4 | 0.5 | 25  | 0               | 21             | -               |
| Slot | Mix1B 4 | 1.0 | 44  | 0               | 34             | -               |
| Slot | Mix1B 4 | 1.5 | 64  | 0               | 45             | -               |
| Slot | Mix1B 4 | 2.0 | 76  | 14              | 57             | 0.01            |
| Slot | Mix1B 4 | 2.5 | 86  | 32              | 66             | 0.03            |
| Slot | Mix1B 4 | 3.0 | 92  | 1004            | 72             | 0.95            |
| Slot | Mix2A 1 | 0.5 | 30  | 0               | 21             | -               |
| Slot | Mix2A 1 | 1.0 | 48  | 0               | 34             | -               |
| Slot | Mix2A 1 | 1.5 | 64  | 0               | 45             | -               |
| Slot | Mix2A 1 | 2.0 | 74  | 38              | 57             | 0.04            |
| Slot | Mix2A 1 | 2.5 | 81  | 34              | 66             | 0.04            |
| Slot | Mix2A 2 | 0.5 | 24  | 0               | 21             | -               |
| Slot | Mix2A 2 | 1.0 | 47  | 0               | 34             | -               |
| Slot | Mix2A 2 | 1.5 | 69  | 0               | 45             | -               |
| Slot | Mix2A 2 | 2.0 | 76  | 24              | 57             | 0.02            |
| Slot | Mix2A 2 | 2.5 | 84  | 22              | 66             | 0.02            |
| Slot | Mix2A 2 | 3.0 | 93  | 210             | 72             | 0.21            |
| Slot | Mix2A 2 | 3.5 | 99  | 98              | 77             | 0.10            |
| Slot | Mix2A 2 | 3.6 | 100 | NA              | 79             | NA              |
| Slot | Mix2A 2 | 3.6 | 102 | 202             | 79             | 0.20            |
| Slot | Mix2A 2 | 3.7 | 102 | 0               | 80             | -               |
| Slot | Mix2A 2 | 3.8 | 103 | 14              | 81             | 0.01            |
| Slot | Mix2A 2 | 3.9 | 104 | 30              | 82             | 0.03            |
| Slot | Mix2A 2 | 4.0 | 105 | 4               | 82             | 0.00            |
| Slot | Mix2A 2 | 4.2 | 108 | 18              | 84             | 0.02            |
| Slot | Mix2A 2 | 4.4 | 109 | 8               | 86             | 0.01            |
| Slot | Mix2A 2 | 4.6 | 112 | 20              | 88             | 0.02            |
| Slot | Mix2A 2 | 4.8 | 114 | 60              | 90             | 0.06            |
| Slot | Mix2A 2 | 5.0 | 115 | 8               | 91             | 0.01            |
| Slot | Mix2A 2 | 5.2 | 115 | 16              | 93             | 0.02            |
| Slot | Mix2A 2 | 5.4 | 116 | 208             | 95             | 0.21            |
| Slot | Mix2A 3 | 0.5 | 25  | 18              | 21             | 0.02            |
| Slot | Mix2A 3 | 1.0 | 52  | 14              | 34             | 0.01            |
| Slot | Mix2A 3 | 1.5 | 69  | 6               | 45             | 0.01            |
| Slot | Mix2A 3 | 2.0 | 75  | 36              | 57             | 0.04            |
| Slot | Mix2A 3 | 2.5 | 86  | 2               | 65             | 0.00            |
| Slot | Mix2A 3 | 3.0 | 85  | 724             | 72             | 0.70            |
| Slot | Mix2A 4 | 0.5 | 30  | 0               | 21             | -               |

| Dam  | #Run     | Q   | h   | m <sub>LW</sub> | h <sub>0</sub> | R <sub>LW</sub> |
|------|----------|-----|-----|-----------------|----------------|-----------------|
| Slot | Mix2A 4  | 1.0 | 48  | 0               | 34             | -               |
| Slot | Mix2A 4  | 1.5 | 67  | 0               | 45             | -               |
| Slot | Mix2A 4  | 2.0 | 78  | 0               | 57             | -               |
| Slot | Mix2B 1  | 0.5 | 25  | 6               | 21             | 0.01            |
| Slot | Mix2B 1  | 1.0 | 39  | 28              | 34             | 0.03            |
| Slot | Mix2B 1  | 1.5 | 53  | 6               | 45             | 0.01            |
| Slot | Mix2B 1  | 2.0 | 68  | 10              | 57             | 0.01            |
| Slot | Mix2B 1  | 2.5 | 77  | 14              | 66             | 0.02            |
| Slot | Mix2B 1  | 3.0 | 85  | 60              | 72             | 0.07            |
| Slot | Mix2B 1  | 3.5 | 90  | 132             | 77             | 0.14            |
| Slot | Mix2B 1  | 4.0 | 96  | 36              | 82             | 0.04            |
| Slot | Mix2B 2  | 0.5 | 29  | 0               | 21             | -               |
| Slot | Mix2B 2  | 1.0 | 43  | 8               | 34             | 0.01            |
| Slot | Mix2B 2  | 1.5 | 66  | 0               | 45             | -               |
| Slot | Mix2B 2  | 2.0 | 73  | 26              | 57             | 0.03            |
| Slot | Mix2B 2  | 2.5 | 80  | 40              | 66             | 0.04            |
| Slot | Mix2B 3  | 0.5 | 26  | 0               | 21             | -               |
| Slot | Mix2B 3  | 1.0 | 49  | 0               | 34             | -               |
| Slot | Mix2B 3  | 1.5 | 65  | 0               | 45             | -               |
| Slot | Mix2B 3  | 2.0 | 76  | 10              | 57             | 0.01            |
| Slot | Mix2B 3  | 2.5 | 80  | 80              | 65             | 0.08            |
| Slot | Mix2B 3  | 3.0 | 88  | 112             | 72             | 0.12            |
| Slot | Mix2B 4  | 0.5 | 24  | 0               | 21             | -               |
| Slot | Mix2B 4  | 1.0 | 43  | 0               | 34             | -               |
| Slot | Mix2B 4  | 1.5 | 61  | 6               | 45             | 0.01            |
| Slot | Mix2B 4  | 2.0 | 72  | 6               | 57             | 0.01            |
| Slot | Mix2B 4  | 2.5 | 76  | 32              | 66             | 0.03            |
| Slot | Mix2B 4  | 3.0 | 86  | 34              | 72             | 0.04            |
| Slot | Mix2B 4  | 3.5 | 96  | 814             | 77             | 0.87            |
| Slot | Mix3B 1  | 0.5 | 27  | 0               | 21             | -               |
| Slot | Mix3B 1  | 1.0 | 42  | 6               | 34             | 0.00            |
| Slot | Mix3B 1  | 1.2 | 51  | 2               | 40             | 0.00            |
| Slot | Mix3B 1  | 1.5 | 62  | 0               | 45             | -               |
| Slot | Mix3B 1  | 1.7 | 70  | 0               | 51             | -               |
| Slot | Mix3B 1  | 2.0 | 76  | 14              | 57             | 0.01            |
| Slot | Mix3B 1  | 2.2 | 77  | 46              | 62             | 0.02            |
| Slot | Mix3B 1  | 2.5 | 81  | 0               | 65             | -               |
| Slot | Mix3B 1  | 2.7 | 86  | 8               | 69             | 0.00            |
| Slot | Mix3B 1  | 3.0 | 90  | 20              | 72             | 0.01            |
| Slot | Mix3B 1  | 3.2 | 94  | 22              | 75             | 0.01            |
| Slot | Mix3B 1  | 3.5 | 96  | 52              | 77             | 0.02            |
| Slot | Mix3B 1  | 3.7 | 102 | 12              | 80             | 0.01            |
| Slot | Mix3B 1  | 4.0 | 104 | 6               | 82             | 0.00            |
| SABO | NoWood 1 | 0.5 | 12  | NA              | 9              | NA              |
| SABO | NoWood 1 | 1.0 | 17  | NA              | 14             | NA              |
| SABO | NoWood 1 | 1.5 | 22  | NA              | 19             | NA              |
| SABO | NoWood 1 | 2.0 | 25  | NA              | 23             | NA              |
| SABO | NoWood 1 | 2.5 | 27  | NA              | 27             | NA              |
| SABO | NoWood 1 | 3.0 | 29  | NA              | 30             | NA              |
| SABO | NoWood 1 | 3.5 | 32  | NA              | 33             | NA              |

| Dam  | #Run     | Q   | h  | m <sub>LW</sub> | h <sub>0</sub> | R <sub>LW</sub> |
|------|----------|-----|----|-----------------|----------------|-----------------|
| SABO | NoWood 1 | 4.0 | 36 | NA              | 36             | NA              |
| SABO | NoWood 1 | 4.5 | 40 | NA              | 39             | NA              |
| SABO | NoWood 1 | 5.0 | 45 | NA              | 42             | NA              |
| SABO | NoWood 1 | 5.5 | 50 | NA              | 45             | NA              |
| SABO | NoWood 1 | 6.0 | 50 | NA              | 48             | NA              |
| SABO | NoWood 1 | 6.5 | 52 | NA              | 50             | NA              |
| SABO | NoWood 1 | 7.0 | 59 | NA              | 53             | NA              |
| SABO | NoWood 1 | 7.5 | 57 | NA              | 55             | NA              |
| SABO | NoWood 1 | 8.0 | 66 | NA              | 58             | NA              |
| SABO | NoWood 1 | 8.4 | 67 | NA              | 59             | NA              |
| SABO | NoWood 2 | 0.5 | 10 | NA              | 9              | NA              |
| SABO | NoWood 2 | 1.0 | 16 | NA              | 14             | NA              |
| SABO | NoWood 2 | 1.5 | 20 | NA              | 19             | NA              |
| SABO | NoWood 2 | 2.0 | 24 | NA              | 23             | NA              |
| SABO | NoWood 2 | 2.5 | 25 | NA              | 27             | NA              |
| SABO | NoWood 2 | 3.0 | 29 | NA              | 30             | NA              |
| SABO | NoWood 2 | 3.5 | 33 | NA              | 33             | NA              |
| SABO | NoWood 2 | 4.0 | 38 | NA              | 36             | NA              |
| SABO | NoWood 2 | 4.5 | 40 | NA              | 39             | NA              |
| SABO | NoWood 2 | 5.0 | 42 | NA              | 42             | NA              |
| SABO | NoWood 2 | 5.5 | 47 | NA              | 45             | NA              |
| SABO | NoWood 2 | 6.0 | 48 | NA              | 48             | NA              |
| SABO | NoWood 2 | 6.5 | 59 | NA              | 50             | NA              |
| SABO | NoWood 2 | 7.0 | 61 | NA              | 53             | NA              |
| SABO | NoWood 2 | 7.5 | 62 | NA              | 55             | NA              |
| SABO | NoWood 2 | 8.0 | 62 | NA              | 58             | NA              |
| SABO | NoWood 2 | 8.5 | 74 | NA              | 60             | NA              |
| SABO | Mix1A 1  | 0.5 | 14 | 0               | 9              | -               |
| SABO | Mix1A 1  | 1.0 | 24 | 12              | 14             | 0.01            |
| SABO | Mix1A 1  | 1.5 | 34 | 6               | 19             | 0.01            |
| SABO | Mix1A 1  | 2.0 | 38 | 0               | 23             | -               |
| SABO | Mix1A 1  | 2.5 | 45 | 2               | 27             | 0.00            |
| SABO | Mix1A 1  | 3.0 | 48 | 2               | 30             | 0.00            |
| SABO | Mix1A 1  | 3.5 | 55 | 4               | 33             | 0.01            |
| SABO | Mix1A 1  | 4.0 | 60 | 4               | 36             | 0.01            |
| SABO | Mix1A 1  | 4.5 | 63 | 38              | 39             | 0.04            |
| SABO | Mix1A 1  | 5.0 | 70 | 16              | 42             | 0.02            |
| SABO | Mix1A 1  | 5.5 | 79 | 8               | 45             | 0.01            |
| SABO | Mix1A 1  | 6.0 | 92 | 12              | 48             | 0.01            |
| SABO | Mix1A 1  | 6.5 | 91 | 22              | 50             | 0.03            |
| SABO | Mix1A 1  | 7.0 | 97 | 10              | 53             | 0.01            |
| SABO | Mix1A 1  | 7.5 | 95 | 146             | 55             | 0.17            |
| SABO | Mix1A 1  | 8.0 | 87 | 62              | 58             | 0.07            |
| SABO | Mix1A 1  | 8.3 | 88 | 18              | 59             | 0.02            |
| SABO | Mix1A 2  | 0.5 | 14 | 0               | 9              | -               |
| SABO | Mix1A 2  | 1.0 | 23 | 14              | 14             | 0.02            |
| SABO | Mix1A 2  | 1.5 | 31 | 4               | 19             | 0.01            |
| SABO | Mix1A 2  | 2.0 | 41 | 28              | 23             | 0.03            |
| SABO | Mix1A 2  | 2.5 | 44 | 0               | 27             | -               |
| SABO | Mix1A 2  | 3.0 | 50 | 6               | 30             | 0.01            |

| Dam  | #Run    | Q   | h  | m <sub>LW</sub> | h <sub>0</sub> | R <sub>LW</sub> |
|------|---------|-----|----|-----------------|----------------|-----------------|
| SABO | Mix1A 2 | 3.5 | 59 | 12              | 33             | 0.01            |
| SABO | Mix1A 2 | 4.0 | 60 | 0               | 36             | -               |
| SABO | Mix1A 2 | 4.5 | 63 | 16              | 39             | 0.02            |
| SABO | Mix1A 2 | 5.0 | 68 | 6               | 42             | 0.01            |
| SABO | Mix1A 2 | 5.5 | 72 | 14              | 45             | 0.02            |
| SABO | Mix1A 2 | 6.0 | 77 | 10              | 48             | 0.01            |
| SABO | Mix1A 2 | 6.5 | 80 | 6               | 50             | 0.01            |
| SABO | Mix1A 2 | 7.0 | 84 | 14              | 53             | 0.02            |
| SABO | Mix1A 2 | 7.5 | 89 | 82              | 55             | 0.10            |
| SABO | Mix1A 2 | 8.0 | 88 | 46              | 58             | 0.05            |
| SABO | Mix1A 2 | 8.2 | 89 | 2               | 59             | 0.00            |
| SABO | Mix1A 3 | 0.5 | 13 | 0               | 9              | -               |
| SABO | Mix1A 3 | 1.0 | 21 | 20              | 14             | 0.02            |
| SABO | Mix1A 3 | 1.5 | 36 | 0               | 19             | -               |
| SABO | Mix1A 3 | 2.0 | 39 | 2               | 23             | 0.00            |
| SABO | Mix1A 3 | 2.5 | 47 | 0               | 27             | -               |
| SABO | Mix1A 3 | 3.0 | 55 | 4               | 30             | 0.00            |
| SABO | Mix1A 3 | 3.5 | 61 | 0               | 33             | -               |
| SABO | Mix1A 3 | 4.0 | 66 | 14              | 36             | 0.02            |
| SABO | Mix1A 3 | 4.5 | 72 | 32              | 39             | 0.04            |
| SABO | Mix1A 3 | 5.0 | 76 | 0               | 42             | -               |
| SABO | Mix1A 3 | 5.5 | 82 | 4               | 45             | 0.00            |
| SABO | Mix1A 3 | 6.0 | 85 | 0               | 48             | -               |
| SABO | Mix1A 3 | 6.5 | 89 | 6               | 50             | 0.01            |
| SABO | Mix1A 3 | 7.0 | 94 | 20              | 53             | 0.02            |
| SABO | Mix1A 3 | 7.5 | 91 | 18              | 55             | 0.02            |
| SABO | Mix1A 3 | 8.0 | 92 | 70              | 58             | 0.08            |
| SABO | Mix1A 3 | 8.2 | 94 | 8               | 59             | 0.01            |
| SABO | Mix2A 1 | 0.5 | 17 | 0               | 9              | -               |
| SABO | Mix2A 1 | 1.0 | 27 | 14              | 14             | 0.01            |
| SABO | Mix2A 1 | 1.5 | 36 | 8               | 19             | 0.01            |
| SABO | Mix2A 1 | 2.0 | 42 | 0               | 23             | -               |
| SABO | Mix2A 1 | 2.5 | 48 | 0               | 27             | -               |
| SABO | Mix2A 1 | 3.0 | 57 | 2               | 30             | 0.00            |
| SABO | Mix2A 1 | 3.5 | 63 | 0               | 33             | -               |
| SABO | Mix2A 1 | 4.0 | 66 | 0               | 36             | -               |
| SABO | Mix2A 1 | 4.5 | 73 | 0               | 39             | -               |
| SABO | Mix2A 1 | 5.0 | 77 | 2               | 42             | 0.00            |
| SABO | Mix2A 1 | 5.5 | 80 | 26              | 45             | 0.03            |
| SABO | Mix2A 1 | 6.0 | 82 | 28              | 48             | 0.03            |
| SABO | Mix2A 1 | 6.5 | 86 | 22              | 50             | 0.02            |
| SABO | Mix2A 1 | 7.0 | 89 | 22              | 53             | 0.02            |
| SABO | Mix2A 1 | 7.5 | 94 | 42              | 55             | 0.04            |
| SABO | Mix2A 1 | 8.0 | 95 | 432             | 58             | 0.45            |
| SABO | Mix2A 2 | 0.5 | 13 | 0               | 9              | -               |
| SABO | Mix2A 2 | 1.0 | 25 | 8               | 14             | 0.01            |
| SABO | Mix2A 2 | 1.5 | 36 | 2               | 19             | 0.00            |
| SABO | Mix2A 2 | 2.0 | 42 | 0               | 23             | -               |
| SABO | Mix2A 2 | 2.5 | 51 | 0               | 27             | -               |
| SABO | Mix2A 2 | 3.0 | 57 | 4               | 30             | 0.00            |

| Dam  | #Run    | Q   | h  | m <sub>LW</sub> | h <sub>0</sub> | R <sub>LW</sub> |
|------|---------|-----|----|-----------------|----------------|-----------------|
| SABO | Mix2A 2 | 3.5 | 61 | 0               | 33             | -               |
| SABO | Mix2A 2 | 4.0 | 68 | 2               | 36             | 0.00            |
| SABO | Mix2A 2 | 4.5 | 74 | 10              | 39             | 0.01            |
| SABO | Mix2A 2 | 5.0 | 79 | 56              | 42             | 0.06            |
| SABO | Mix2A 2 | 5.5 | 81 | 52              | 45             | 0.05            |
| SABO | Mix2A 2 | 6.0 | 83 | 16              | 48             | 0.02            |
| SABO | Mix2A 2 | 6.5 | 88 | 16              | 50             | 0.02            |
| SABO | Mix2A 2 | 7.0 | 91 | 36              | 53             | 0.04            |
| SABO | Mix2A 2 | 7.5 | 94 | 10              | 55             | 0.01            |
| SABO | Mix2A 3 | 0.5 | 12 | 0               | 9              | -               |
| SABO | Mix2A 3 | 1.0 | 23 | 0               | 14             | -               |
| SABO | Mix2A 3 | 1.5 | 34 | 0               | 19             | -               |
| SABO | Mix2A 3 | 2.0 | 43 | 0               | 23             | -               |
| SABO | Mix2A 3 | 2.5 | 51 | 6               | 27             | 0.01            |
| SABO | Mix2A 3 | 3.0 | 57 | 2               | 30             | 0.00            |
| SABO | Mix2A 3 | 3.5 | 64 | 2               | 33             | 0.00            |
| SABO | Mix2A 3 | 4.0 | 70 | 14              | 36             | 0.01            |
| SABO | Mix2A 3 | 4.5 | 76 | 8               | 39             | 0.01            |
| SABO | Mix2A 3 | 5.0 | 81 | 8               | 42             | 0.01            |
| SABO | Mix2A 3 | 5.5 | 85 | 48              | 45             | 0.05            |
| SABO | Mix2A 3 | 6.0 | 87 | 30              | 48             | 0.03            |
| SABO | Mix2B 1 | 0.5 | 13 | 0               | 9              | -               |
| SABO | Mix2B 1 | 1.0 | 21 | 8               | 14             | 0.01            |
| SABO | Mix2B 1 | 1.5 | 33 | 2               | 19             | 0.00            |
| SABO | Mix2B 1 | 2.0 | 37 | 0               | 23             | -               |
| SABO | Mix2B 1 | 2.5 | 42 | 0               | 27             | -               |
| SABO | Mix2B 1 | 3.0 | 46 | 4               | 30             | 0.01            |
| SABO | Mix2B 1 | 3.5 | 54 | 4               | 33             | 0.01            |
| SABO | Mix2B 1 | 4.0 | 58 | 0               | 36             | -               |
| SABO | Mix2B 1 | 4.5 | 63 | 2               | 39             | 0.00            |
| SABO | Mix2B 1 | 5.0 | 68 | 6               | 42             | 0.01            |
| SABO | Mix2B 1 | 5.5 | 73 | 4               | 45             | 0.01            |
| SABO | Mix2B 1 | 6.0 | 77 | 4               | 48             | 0.01            |
| SABO | Mix2B 1 | 6.5 | 81 | 6               | 50             | 0.01            |
| SABO | Mix2B 1 | 7.0 | 85 | 2               | 53             | 0.00            |
| SABO | Mix2B 1 | 7.5 | 85 | 48              | 55             | 0.06            |
| SABO | Mix2B 1 | 8.0 | 89 | 2               | 58             | 0.00            |
| SABO | Mix2B 1 | 8.3 | 92 | 4               | 59             | 0.01            |
| SABO | Mix2B 2 | 0.5 | 13 | 0               | 9              | -               |
| SABO | Mix2B 2 | 1.0 | 21 | 0               | 14             | -               |
| SABO | Mix2B 2 | 1.5 | 29 | 0               | 19             | -               |
| SABO | Mix2B 2 | 2.0 | 37 | 0               | 23             | -               |
| SABO | Mix2B 2 | 2.5 | 44 | 0               | 27             | -               |
| SABO | Mix2B 2 | 3.0 | 48 | 0               | 30             | -               |
| SABO | Mix2B 2 | 3.5 | 55 | 0               | 33             | -               |
| SABO | Mix2B 2 | 4.0 | 61 | 0               | 36             | -               |
| SABO | Mix2B 2 | 4.5 | 66 | 0               | 39             | -               |
| SABO | Mix2B 2 | 5.0 | 71 | 0               | 42             | -               |
| SABO | Mix2B 2 | 5.5 | 76 | 0               | 45             | -               |
| SABO | Mix2B 2 | 6.0 | 77 | 16              | 48             | 0.02            |

| Dam  | #Run    | Q   | h   | m <sub>LW</sub> | h <sub>0</sub> | R <sub>LW</sub> |
|------|---------|-----|-----|-----------------|----------------|-----------------|
| SABO | Mix2B 2 | 6.5 | 81  | 22              | 50             | 0.03            |
| SABO | Mix2B 2 | 7.0 | 84  | 28              | 53             | 0.03            |
| SABO | Mix2B 2 | 7.5 | 86  | 430             | 55             | 0.53            |
| SABO | Mix2B 3 | 0.5 | 12  | 0               | 9              | -               |
| SABO | Mix2B 3 | 1.0 | 23  | 12              | 14             | 0.02            |
| SABO | Mix2B 3 | 1.5 | 31  | 8               | 19             | 0.01            |
| SABO | Mix2B 3 | 2.0 | 43  | 0               | 23             | -               |
| SABO | Mix2B 3 | 2.5 | 48  | 0               | 27             | -               |
| SABO | Mix2B 3 | 3.0 | 54  | 0               | 30             | -               |
| SABO | Mix2B 3 | 3.5 | 59  | 0               | 33             | -               |
| SABO | Mix2B 3 | 4.0 | 62  | 0               | 36             | -               |
| SABO | Mix2B 3 | 4.5 | 68  | 30              | 39             | 0.04            |
| SABO | Mix2B 3 | 5.0 | 73  | 10              | 42             | 0.01            |
| SABO | Mix2B 3 | 5.5 | 77  | 36              | 45             | 0.04            |
| SABO | Mix3B 1 | 0.5 | 13  | 0               | 9              | -               |
| SABO | Mix3B 1 | 1.0 | 23  | 8               | 14             | 0.00            |
| SABO | Mix3B 1 | 1.5 | 34  | 8               | 19             | 0.00            |
| SABO | Mix3B 1 | 2.0 | 41  | 0               | 23             | -               |
| SABO | Mix3B 1 | 2.5 | 45  | 14              | 27             | 0.01            |
| SABO | Mix3B 1 | 3.0 | 52  | 0               | 30             | -               |
| SABO | Mix3B 1 | 3.5 | 61  | 0               | 33             | -               |
| SABO | Mix3B 1 | 4.0 | 68  | 4               | 36             | 0.00            |
| SABO | Mix3B 1 | 4.5 | 73  | 2               | 39             | 0.00            |
| SABO | Mix3B 1 | 5.0 | 77  | 38              | 42             | 0.02            |
| SABO | Mix3B 1 | 5.5 | 80  | 2               | 45             | 0.00            |
| SABO | Mix3B 1 | 6.0 | 84  | 22              | 48             | 0.01            |
| SABO | Mix3B 1 | 6.5 | 86  | 16              | 50             | 0.01            |
| SABO | Mix3B 1 | 7.0 | 88  | 10              | 53             | 0.00            |
| SABO | Mix3B 1 | 7.5 | 93  | 8               | 55             | 0.00            |
| SABO | Mix3B 1 | 8.0 | 99  | 0               | 58             | -               |
| SABO | Mix3B 1 | 8.5 | 102 | 86              | 60             | 0.03            |
| SABO | Mix3B 2 | 0.5 | 15  | 0               | 9              | -               |
| SABO | Mix3B 2 | 1.0 | 26  | 0               | 14             | -               |
| SABO | Mix3B 2 | 1.5 | 37  | 0               | 19             | -               |
| SABO | Mix3B 2 | 2.0 | 47  | 0               | 23             | -               |
| SABO | Mix3B 2 | 2.5 | 54  | 0               | 27             | -               |
| SABO | Mix3B 2 | 3.0 | 58  | 0               | 30             | -               |
| SABO | Mix3B 2 | 3.5 | 62  | 0               | 33             | -               |
| SABO | Mix3B 2 | 4.0 | 67  | 0               | 36             | -               |
| SABO | Mix3B 2 | 4.5 | 73  | 0               | 39             | -               |
| SABO | Mix3B 2 | 5.0 | 77  | 14              | 42             | 0.01            |
| SABO | Mix3B 2 | 5.5 | 82  | 0               | 45             | -               |
| SABO | Mix3B 2 | 6.0 | 88  | 26              | 48             | 0.01            |
| SABO | Mix3B 2 | 6.5 | 91  | 18              | 50             | 0.01            |
| SABO | Mix3B 2 | 7.0 | 94  | 12              | 53             | 0.01            |
| SABO | Mix3B 2 | 7.5 | 100 | 0               | 55             | -               |
| SABO | Mix3B 2 | 8.0 | 103 | 44              | 58             | 0.02            |
| SABO | Mix3B 2 | 8.4 | 105 | 34              | 60             | 0.01            |
| SABO | Mix3B 3 | 0.5 | 13  | 0               | 9              | -               |
| SABO | Mix3B 3 | 1.0 | 24  | 6               | 14             | 0.00            |

35

| Dam  | #Run    | Q   | h   | m <sub>LW</sub> | h <sub>0</sub> | R <sub>LW</sub> |
|------|---------|-----|-----|-----------------|----------------|-----------------|
| SABO | Mix3B 3 | 1.5 | 34  | 2               | 19             | 0.00            |
| SABO | Mix3B 3 | 2.0 | 44  | 0               | 23             | -               |
| SABO | Mix3B 3 | 2.5 | 53  | 0               | 27             | -               |
| SABO | Mix3B 3 | 3.0 | 60  | 0               | 30             | -               |
| SABO | Mix3B 3 | 3.5 | 66  | 2               | 33             | 0.00            |
| SABO | Mix3B 3 | 4.0 | 69  | 0               | 36             | -               |
| SABO | Mix3B 3 | 4.5 | 74  | 0               | 39             | -               |
| SABO | Mix3B 3 | 5.0 | 78  | 48              | 42             | 0.02            |
| SABO | Mix3B 3 | 5.5 | 83  | 0               | 45             | -               |
| SABO | Mix3B 3 | 6.0 | 88  | 0               | 48             | -               |
| SABO | Mix3B 3 | 6.5 | 92  | 6               | 50             | 0.00            |
| SABO | Mix3B 3 | 7.0 | 97  | 26              | 53             | 0.01            |
| SABO | Mix3B 3 | 7.5 | 102 | 2               | 55             | 0.00            |
